# Supplementary material for: Human Memory Th17 Cell Populations Change Into Anti-inflammatory Cells With Regulatory Capacity Upon Exposure to Active Vitamin D
Source: PubMed Central journal article supplement (PMC6651215; doi:10.3389/fimmu.2019.01504), 2019-07-17
Supplement: Image_2.pdf [file Image_2.pdf]

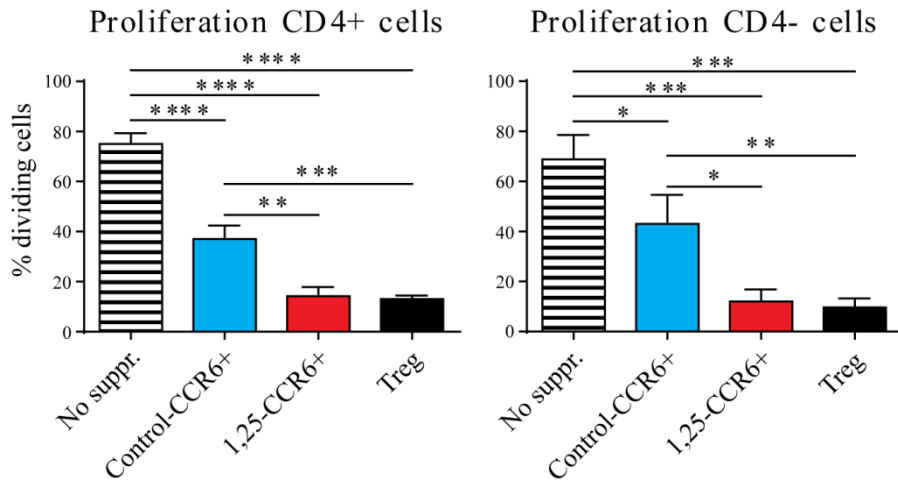

**Figure S2.** 1,25(OH)<sub>2</sub>D<sub>3</sub>-treated CCR6<sup>+</sup> Th memory cells equally suppress proliferation in CD4<sup>+</sup> and CD4<sup>-</sup> cells. Suppression assay is set-up as in figure 2, but during analysis of proliferation, responder cells are distinguished based on CD4 expression. Mean and SEM represent 3 healthy donors. Data are representative of 4 independent experiments. \*p<0.05, \*\*p<0.01, \*\*\*p<0.001, \*\*\*\*p<0.0001.
