# Supplementary material for: Human Memory Th17 Cell Populations Change Into Anti-inflammatory Cells With Regulatory Capacity Upon Exposure to Active Vitamin D
Source: PubMed Central journal article supplement (PMC6651215; doi:10.3389/fimmu.2019.01504), 2019-07-17
Supplement: Table_1.pdf [file Table_1.pdf]

| <b>Parameters</b>       | <b>Treatment-naïve early RA patients (PBMC)<br/>Mean ± SEM (n=3)</b> | <b>Established RA patients (synovial fluid)<br/>Mean ± SEM (n=6)</b>                                                    |
|-------------------------|----------------------------------------------------------------------|-------------------------------------------------------------------------------------------------------------------------|
| Age                     | 42.06 ± 8.00                                                         | 58.17 ± 2.14                                                                                                            |
| DAS28                   | 2.59 ± 0.15                                                          | 4.57 ± 0.29                                                                                                             |
| VAS                     | 42.33 ± 5.89                                                         | 81.50 ± 8.32                                                                                                            |
| ESR                     | 30.00 ± 2.62                                                         | 26.40 ± 8.57                                                                                                            |
| CRP                     | 12.33 ± 8.03                                                         | 19.00 ± 2.87                                                                                                            |
| TJC28                   | 2.33 ± 0.72                                                          | 3.33 ± 0.51                                                                                                             |
| SJC28                   | 3.67 ± 0.98                                                          | 1.83 ± 0.44                                                                                                             |
| Disease duration (days) | 99.00 ± 28.58                                                        | N/A                                                                                                                     |
| Medication              | None                                                                 | Methotrexate (5/6)<br>Vitamin D (800 IU/day, 4/6)<br>Tocilizumab (1/6)<br>Adalimumab (2/6)<br>Conventional DMARDs (1/6) |

**Table S1** Characteristics of patients used in this study. PBMC of treatment-naïve early RA patients were used for microarray gene expression profiles
