# Supplementary material for: Human Memory Th17 Cell Populations Change Into Anti-inflammatory Cells With Regulatory Capacity Upon Exposure to Active Vitamin D
Source: PubMed Central journal article supplement (PMC6651215; doi:10.3389/fimmu.2019.01504), 2019-07-17
Supplement: Table_2.pdf [file Table_2.pdf]

| <b>Gene</b> | <b>Probe ID</b> | <b>Gene</b> | <b>Probe ID</b> |
|-------------|-----------------|-------------|-----------------|
| AHR (1)     | ILMN_1812640    | CXCR5       | ILMN_2337928    |
| AHR (2)     | ILMN_2162799    | CXCR6       | ILMN_1674640    |
| CCR1        | ILMN_1678833    | CXCR7 (1)   | ILMN_1798360    |
| CCR10       | ILMN_1666493    | CXCR7 (2)   | ILMN_2371458    |
| CCR2 (1)    | ILMN_1774761    | FOXP3       | ILMN_1768049    |
| CCR2 (2)    | ILMN_2276996    | IFNG        | ILMN_2207291    |
| CCR2 (3)    | ILMN_1777461    | IL10        | ILMN_2073307    |
| CCR2 (4)    | ILMN_1669062    | IL10RA      | ILMN_1652825    |
| CCR2 (5)    | ILMN_1769895    | IL10RB (1)  | ILMN_1767360    |
| CCR4        | ILMN_2086143    | IL10RB (2)  | ILMN_2230892    |
| CCR6 (1)    | ILMN_1690907    | IL17A       | ILMN_1774983    |
| CCR6 (1)    | ILMN_2387696    | IL17F       | ILMN_2188247    |
| CCR6 (2)    | ILMN_2387696    | IL22 (1)    | ILMN_1735208    |
| CCR6 (2)    | ILMN_1690907    | IL22 (2)    | ILMN_2100046    |
| CCR7        | ILMN_1715131    | IL23R (1)   | ILMN_1734937    |
| CCR8        | ILMN_1739421    | IL23R (2)   | ILMN_2223663    |
| CCR9        | ILMN_1664316    | IL26        | ILMN_2123182    |
| CCRL1       | ILMN_1773992    | ITGA2       | ILMN_1665792    |
| CCRL2       | ILMN_3190833    | LAG3        | ILMN_1813338    |
| CD226       | ILMN_1687825    | MAF (1)     | ILMN_1722206    |
| CSF2        | ILMN_1661861    | MAF (2)     | ILMN_1719543    |
| CTLA4 (1)   | ILMN_2261627    | PDCD1       | ILMN_1806725    |
| CTLA4 (2)   | ILMN_2348905    | PRDM1 (1)   | ILMN_2414165    |
| CTLA4 (3)   | ILMN_1763487    | PRDM1 (2)   | ILMN_2298159    |
| CXCR3       | ILMN_1797975    | PRDM1 (3)   | ILMN_1655077    |
| CXCR4 (1)   | ILMN_2320888    | RORC (1)    | ILMN_1734366    |
| CXCR4 (2)   | ILMN_2246410    | RORC (2)    | ILMN_1771126    |
| CXCR4 (3)   | ILMN_1801584    | XCR1        | ILMN_1764034    |

**Table S2** Illumina probe ID and the corresponding gene code as used in this report.
