# Supplementary material for: Human Memory Th17 Cell Populations Change Into Anti-inflammatory Cells With Regulatory Capacity Upon Exposure to Active Vitamin D
Source: PubMed Central journal article supplement (PMC6651215; doi:10.3389/fimmu.2019.01504), 2019-07-17
Supplement: Table_3.pdf [file Table_3.pdf]

| Gene   | Forward primer                | Reverse primer                       | Probe |
|--------|-------------------------------|--------------------------------------|-------|
| HPRT   | 5'-TGACCTTGATTTATTTGCATACC-3' | 5'-CGAGCAAGACG TTCAGTCCT-3'          | 73    |
| FOXP3  | 5'-ACCTACGCCACGCTCATC-3'      | 5'-TCATTAAGTGTCCGCTGCT-3'            | 50    |
| CTLA4  | 5'-TCACAGCTGTTTCTTTGAGCA-3'   | 5'-AGGCTGAAATTGCTTTTCACA-3'          | 21    |
| CD49B  | 5'-TCGTGCACAGTTTTGAAGATG-3'   | 5'-TGGAACACTTCCTGTTGTTACC-3'         | 7     |
| LAG3   | 5'-CAAGAACGCTTTGTGTGGAG-3'    | 5'-CCAGCCAAGGTCCTGAGA-3'             | 82    |
| IL10RA | 5'-CCGAAAGAAGCTACCCAGTG-3'    | 5'-GGACGCTGGCTGATGAAG-3'             | 23    |
| IL10RB | 5'-GGTCGTGTGCTTGGAGGA-3'      | 5'-GGTACCATTCCCAATGCTGA-3'           | 20    |
| CD226  | 5'-CGTGATGAGATTGACTGTAGCC-3'  | 5'-<br>AACAAACAACAACAATAAAACTGTCC-3' | 5     |
| PRDM1  | 5'-ACGTGTGGGTACGACCTTG-3'     | 5'-CTGCCAATCCCTGAAACCT-3'            | 67    |
| PDCD1  | 5'-AGAAGGCGGCACTCTGGT-3'      | 5'-GGCCTGTCTGGGGAGTCTA-3'            | 32    |
| AHR    | 5'-AGCCGGTGCAGAAAACAGT-3'     | 5'-CTATGCCGCTTGGAAGGAT-3'            | 33    |
| RORC   | 5'-CAGCGCTCCAACATCTTCT-3'     | 5'-CCACATCTCCACATGGACT-3'            | 69    |
| IL23R  | 5'-CCTGGCTCTGAAGTGGAATTA-3'   | 5'-GGCTATTACTGCATCCCATTG-3'          | 38    |

**Table S3** Primers and probes used for RT-PCR
